# Supplementary material for: ChIP-Hub provides an integrative platform for exploring plant regulome
Source: PubMed Central journal article supplement (PMC9197862; doi:10.1038/s41467-022-30770-1), 2022-06-14
Supplement: 41467_2022_30770_MOESM3_ESM.pdf [file 41467_2022_30770_MOESM3_ESM.pdf]

## **Description of Additional Supplementary Files**

### **Supplementary Data 1**

Description: Number of identified peaks in all experiments.

### **Supplementary Data 2**

Description: ChIP-seq experiments in *Arabidopsis thaliana* used in the analysis.

### **Supplementary Data 3**

Description: TF-miRNA-TF FFLs in *Arabidopsis thaliana*.

### **Supplementary Data 4**

Description: Open chromatin datasets used for enhancer prediction.

### **Supplementary Data 5**

Description: Quantitative analysis of promoters and enhancers.

### **Supplementary Data 6**

Description: GO analysis of tissue-specific regulatory elements. P-values are calculated by the hypergeometric distribution test and adjusted by the Benjamini-Hochberg method.

### **Supplementary Data 7**

Description: Open chromatin data used for comparative genome analysis.

### **Supplementary Data 8**

Description: Promoters and Enhancers identified in this study.

### **Supplementary Data 9**

Description: Histone modification ChIP-seq experiments used for ChromHMM analysis.

### **Supplementary Data 10**

Description: Examples of metadata files. Different cases of experiment metadata.

### **Supplementary Data 11**

Description: Plant species and genome information used in this study.

### **Supplementary Data 12**

Description: Quality categories for different metrics.
